# Supplementary material for: Evaluation of the Submaximal Treadmill-Based Fitness Test in Six Brachycephalic Breeds—A Follow-Up Study
Source: MDPI journal article supplement (doi:10.3390/ani13213413), 2023-11-03
Supplement: s1 [file s1]

*Supplementary Materials:*

**File S1.** Descriptive statistics of demographic data of included dogs, divided into breed groups.

|                     | <b>Total<br/>(n = 72)</b> | <b>Boston Terriers<br/>(n = 28)</b> | <b>French Bulldogs<br/>(n = 32)</b> | <b>Small Brachycephalic Breeds<br/>(n = 12)</b> |
|---------------------|---------------------------|-------------------------------------|-------------------------------------|-------------------------------------------------|
| <b>Gender</b>       |                           |                                     |                                     |                                                 |
| Female              | 45                        | 18                                  | 23                                  | 4                                               |
| Male                | 27                        | 10                                  | 9                                   | 8                                               |
| <b>Age (years)</b>  |                           |                                     |                                     |                                                 |
| Mean ( $\pm$ SD)    | 4.2 $\pm$ 2.1             | 4.8 $\pm$ 1.9                       | 3.7 $\pm$ 2.1                       | 4.3 $\pm$ 2.3                                   |
| <b>Weight (kg)</b>  |                           |                                     |                                     |                                                 |
| Mean ( $\pm$ SD)    | 9.8 $\pm$ 3.3             | 8.4 $\pm$ 1.6                       | 12.7 $\pm$ 1.8                      | 5.2 $\pm$ 1.9                                   |
| <b>BCS (1-9)</b>    |                           |                                     |                                     |                                                 |
| Median (Range)      | 5 (4 - 8)                 | 5 (4 - 6)                           | 6 (4 - 8)                           | 5 (4 - 7)                                       |
| <b>Speed (km/h)</b> |                           |                                     |                                     |                                                 |
| Mean ( $\pm$ SD)    | 4.9 $\pm$ 0.6             | 5.4 $\pm$ 0.5                       | 4.7 $\pm$ 0.5                       | 4.3 $\pm$ 0.6                                   |

**File S2.** Breathing noises (BN) of all dogs subdivided into breed groups at rest and after 5, 10 and 17 minutes of exercise.

|                           |                 | <b>Boston Terriers</b>                      |              |               |               |
|---------------------------|-----------------|---------------------------------------------|--------------|---------------|---------------|
| <b>Time Point</b>         |                 | <b>At Rest</b>                              | <b>5 min</b> | <b>11 min</b> | <b>17 min</b> |
| <b>Number of subjects</b> |                 | 28                                          | 28           | 28            | 28            |
| <b>No BN</b>              |                 | 27/28 (96%)                                 | 22/28 (79%)  | 22/28 (79%)   | 21/28 (75%)   |
|                           |                 | <b>BN audible without stethoscope (n)</b>   |              |               |               |
| <b>Intermittent</b>       | <b>Mild</b>     | 0                                           | 0            | 1             | 3             |
|                           | <b>Moderate</b> | 0                                           | 0            | 0             | 0             |
|                           | <b>Severe</b>   | 0                                           | 0            | 0             | 0             |
| <b>Constant</b>           | <b>Mild</b>     | 0                                           | 1            | 1             | 0             |
|                           | <b>Moderate</b> | 0                                           | 0            | 0             | 0             |
|                           | <b>Severe</b>   | 0                                           | 0            | 0             | 0             |
|                           |                 | <b>BN audible only with stethoscope (n)</b> |              |               |               |
| <b>Intermittent</b>       | <b>Mild</b>     | 1                                           | 3            | 3             | 3             |
|                           | <b>Moderate</b> | 0                                           | 0            | 0             | 0             |
|                           | <b>Severe</b>   | 0                                           | 0            | 0             | 0             |
| <b>Constant</b>           | <b>Mild</b>     | 0                                           | 1            | 1             | 1             |
|                           | <b>Moderate</b> | 0                                           | 0            | 0             | 0             |
|                           | <b>Severe</b>   | 0                                           | 0            | 0             | 0             |
|                           |                 | <b>French Bulldogs</b>                      |              |               |               |
| <b>Time Point</b>         |                 | <b>At Rest</b>                              | <b>5 min</b> | <b>11 min</b> | <b>17 min</b> |
| <b>Number of subjects</b> |                 | 32                                          | 32           | 32            | 32            |
| <b>No BN</b>              |                 | 16/32 (50%)                                 | 14/32 (44%)  | 10/32 (31%)   | 12/32 (38%)   |
|                           |                 | <b>BN audible without stethoscope (n)</b>   |              |               |               |

|                                             |                 |                |              |               |               |
|---------------------------------------------|-----------------|----------------|--------------|---------------|---------------|
| <b>Intermittent</b>                         | <b>Mild</b>     | 2              | 0            | 3             | 3             |
|                                             | <b>Moderate</b> | 1              | 2            | 0             | 0             |
|                                             | <b>Severe</b>   | 0              | 0            | 0             | 0             |
| <b>Constant</b>                             | <b>Mild</b>     | 1              | 3            | 4             | 5             |
|                                             | <b>Moderate</b> | 6              | 4            | 6             | 5             |
|                                             | <b>Severe</b>   | 2              | 4            | 4             | 5             |
| <b>BN audible only with stethoscope (n)</b> |                 |                |              |               |               |
| <b>Intermittent</b>                         | <b>Mild</b>     | 2              | 0            | 3             | 2             |
|                                             | <b>Moderate</b> | 0              | 1            | 0             | 0             |
|                                             | <b>Severe</b>   | 0              | 0            | 0             | 0             |
| <b>Constant</b>                             | <b>Mild</b>     | 1              | 2            | 1             | 0             |
|                                             | <b>Moderate</b> | 1              | 2            | 1             | 0             |
|                                             | <b>Severe</b>   | 0              | 0            | 0             | 0             |
| <b>Small Brachycephalic Breeds</b>          |                 |                |              |               |               |
| <b>Time Point</b>                           |                 | <b>At Rest</b> | <b>5 min</b> | <b>11 min</b> | <b>17 min</b> |
| <b>Number of subjects</b>                   |                 | 12             | 12           | 12            | 12            |
| <b>No BN</b>                                |                 | 10/12 (83%)    | 7/12 (58%)   | 5/12 (42%)    | 6/12 (50%)    |
| <b>BN audible without stethoscope (n)</b>   |                 |                |              |               |               |
| <b>Intermittent</b>                         | <b>Mild</b>     | 2              | 3            | 3             | 4             |
|                                             | <b>Moderate</b> | 0              | 0            | 1             | 0             |
|                                             | <b>Severe</b>   | 0              | 0            | 0             | 0             |
| <b>Constant</b>                             | <b>Mild</b>     | 0              | 0            | 0             | 0             |
|                                             | <b>Moderate</b> | 0              | 0            | 0             | 1             |
|                                             | <b>Severe</b>   | 0              | 0            | 0             | 0             |
| <b>BN audible only with stethoscope (n)</b> |                 |                |              |               |               |
| <b>Intermittent</b>                         | <b>Mild</b>     | 0              | 2            | 3             | 1             |
|                                             | <b>Moderate</b> | 0              | 0            | 0             | 0             |
|                                             | <b>Severe</b>   | 0              | 0            | 0             | 0             |
| <b>Constant</b>                             | <b>Mild</b>     | 0              | 0            | 0             | 0             |
|                                             | <b>Moderate</b> | 0              | 0            | 0             | 0             |
|                                             | <b>Severe</b>   | 0              | 0            | 0             | 0             |
